# Supplementary material for: Conjugated microporous polymer with matched energy band structure as photocatalyst for simultaneous removal of heavy metal ion and organic pollutant
Source: Royal Society of Chemistry journal article supplement (doi:10.1039/d4nj00373j), 2024-01-01
Supplement: d4nj00373j1.pdf [file d4nj00373j1.pdf]

# **Conjugated microporous polymer with matched energy band structure as photocatalyst for simultaneous removal of heavy metal ion and organic pollutant**

Jing Zang,<sup>‡a</sup> Changjiang Bao,<sup>‡a</sup> Hao Li,<sup>a</sup> Yue Gao,<sup>a</sup> Xiaohan Dou,<sup>a</sup> Yanwei Li,<sup>a,\*</sup> Wenyue Dong<sup>a,b</sup>, Linfang Shi,<sup>c</sup> Yanhui Li<sup>d</sup> and Qian Duan<sup>a,\*</sup>

<sup>a</sup> School of Materials Science and Engineering, Engineering Research Center of Optoelectronic Functional Materials, Changchun University of Science and Technology, Changchun, 130022, China

<sup>b</sup> Chongqing Research Institute, Changchun University of Science and Technology, Chongqing 401135, China

<sup>c</sup> College of Chemistry and Material Engineering, Zhejiang Agriculture and Forestry University, Linan, 311300, China

<sup>d</sup> School of Materials Science and Engineering, Xiamen University of Technology, Xiamen, 361024, China

<sup>#</sup> The first two authors contributed equally to the work.

\* Corresponding Author E-mail addresses: liyanwei@cust.edu.cn, duanqian88@hotmail.com

## Experimental section

### Synthesis of TAPP

The *p*-nitrobenzaldehyde (4 g) and nitrobenzene (25 mL) were added to the flask, followed by the addition of lactic acid (15 mL). Subsequently, the mixture was stirred to dissolve. A solution of nitrobenzene (15 mL) and pyrrole (1.83 mL) was added dropwise into the reaction and then heated to 140 °C for 2 h. After the reaction was over, the solution temperature was reduced to 60 °C and methanol (15 mL) was added, then cooled to room temperature. After overnight, the precipitant was filtered, washed and dried. The purple TNPP (1.1 g) solid was obtained with a yield of 15%.

TNPP (500 mg), Na<sub>2</sub>S · 9H<sub>2</sub>O (2.6 g), NH<sub>4</sub>Cl (160 mg) and N, N-dimethylformamide (50 mL) were added into the flask, and then was stirred to dissolve. The mixture solution was heated to react at 70 °C for 8 h. When the reaction was over, the mixture solution was poured into deionized water and settle overnight. After overnight, the precipitant was filtered, washed and dried. The dried precipitant was further purified using dichloromethane by Soxhlet extraction. Finally, the purple TAPP solid (0.324 g) was obtained in a yield of 80%.”

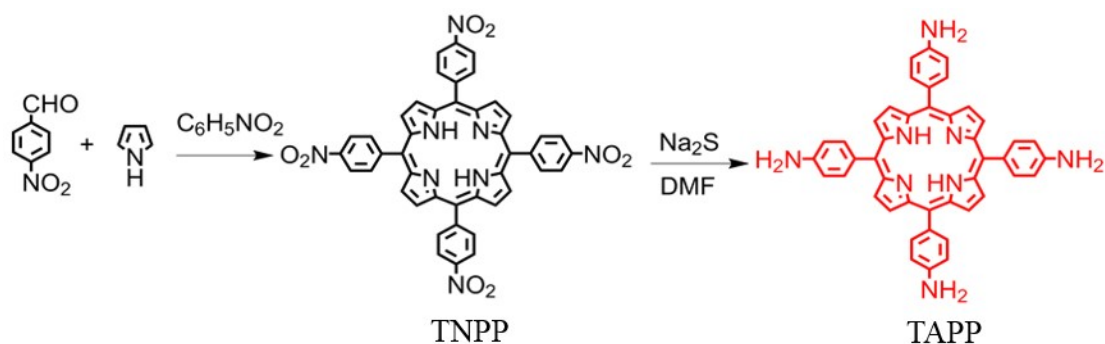

Fig. S1 Synthesis of TAPP.

### **Synthesis of Cu-TAPP-PD-CMP and Ni-TAPP-PD-CMP**

In a 50 mL flask, TAPP-PD-CMP (50 mg), and  $\text{Cu}(\text{AC})_2 \cdot \text{H}_2\text{O}$  (180 mg) or  $\text{Ni}(\text{AC})_2 \cdot \text{H}_2\text{O}$  (176 mg) was dissolved in DMF (40 mL) solution. The mixtures were heated at 120 °C for 10 h. After cooling to room temperature, the reactants were poured into beaker with a large amount of ultrapure water, filtered, washed three times with deionized water, and dried in a vacuum oven for 24 h to obtain the product Cu-TAPP-PD-CMP or Ni-TAPP-PD-CMP.

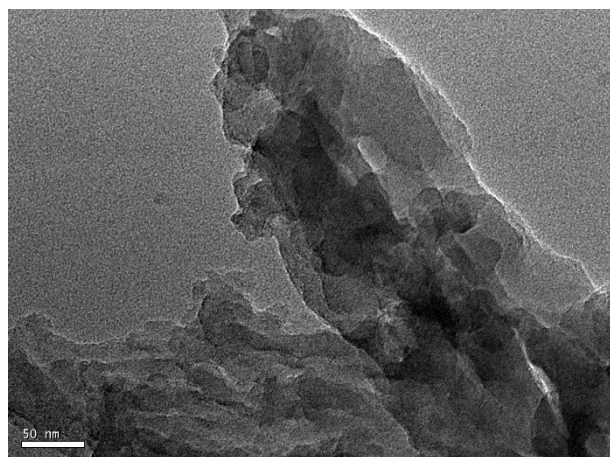

**Fig. S2** TEM image of TAPP-PD-CMP.

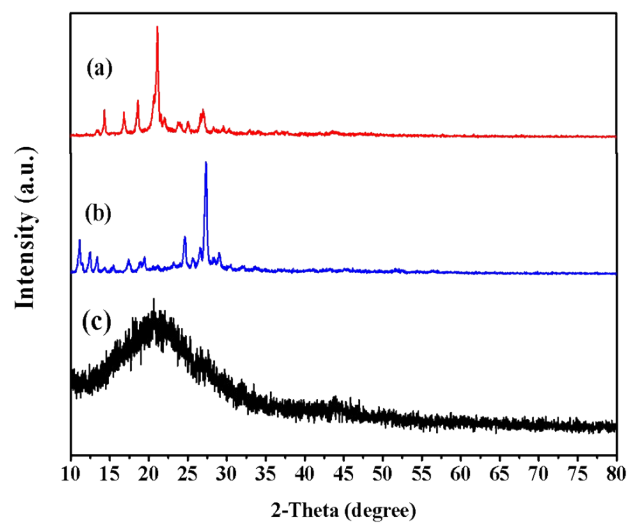

**Fig. S3** PXRD patterns of (a) TAPP, (b) PD and (c) TAPP-PD-CMP.

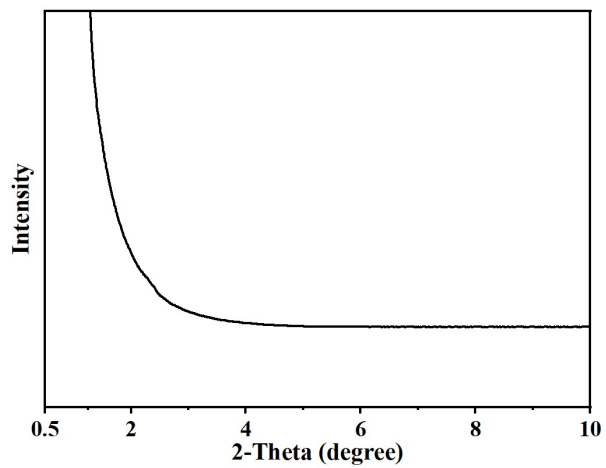

**Fig. S4** Small angle XRD of TAPP-PD-CMP.

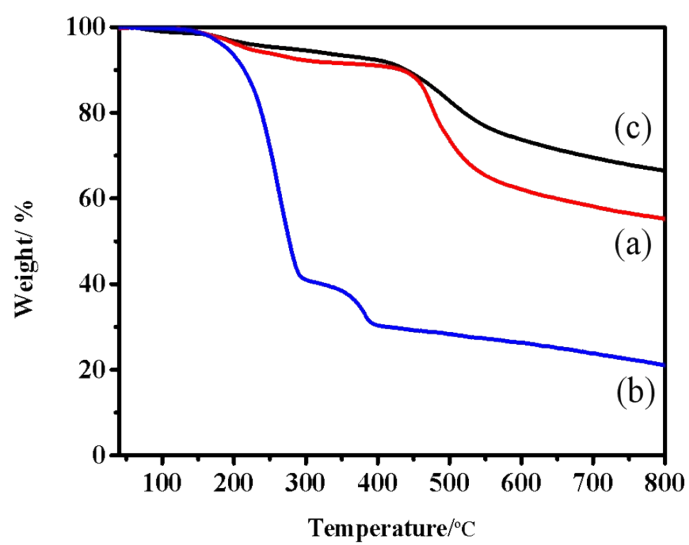

**Fig. S5** TG curves of (a) TAPP, (b) PD and (c) TAPP-PD-CMP.

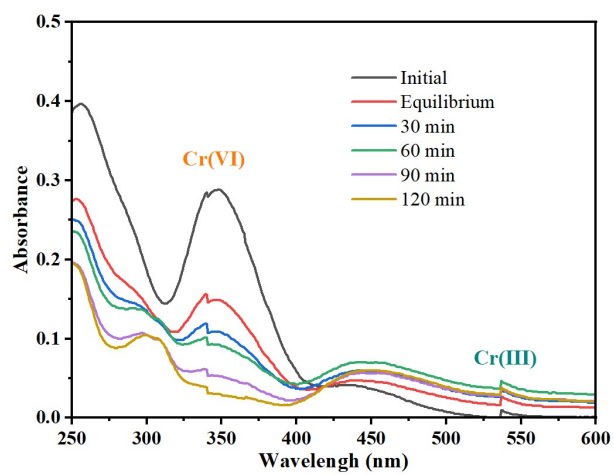

Fig. S5 UV-Visible spectra of Cr(VI) in mono-component system over TAPP-PD-CMP.



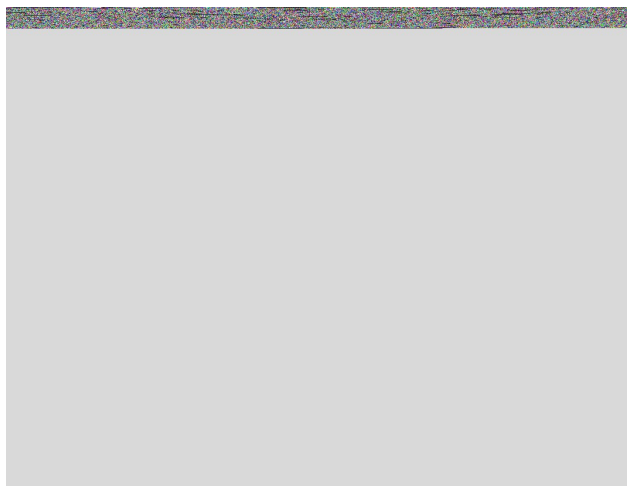

**Fig. S6** UV–Visible spectra of Cr(VI) in mono-component system over TAPP-PD-CMP.

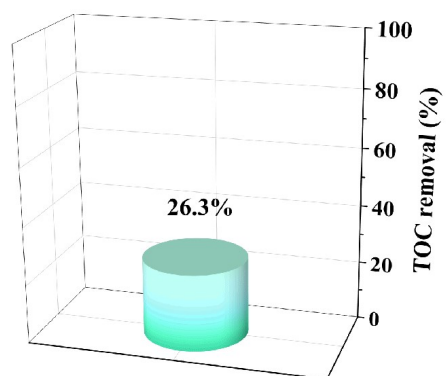

**Fig. S7** Removal of TOC after photocatalytic reactions.

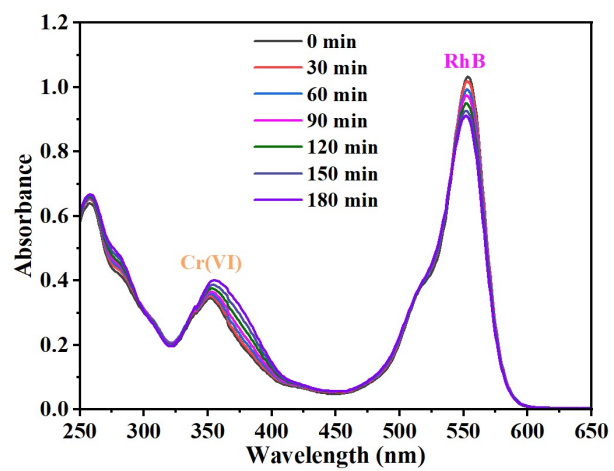

**Fig. S8** Time-dependent UV-Vis spectra of RhB and Cr(VI) without catalyst.

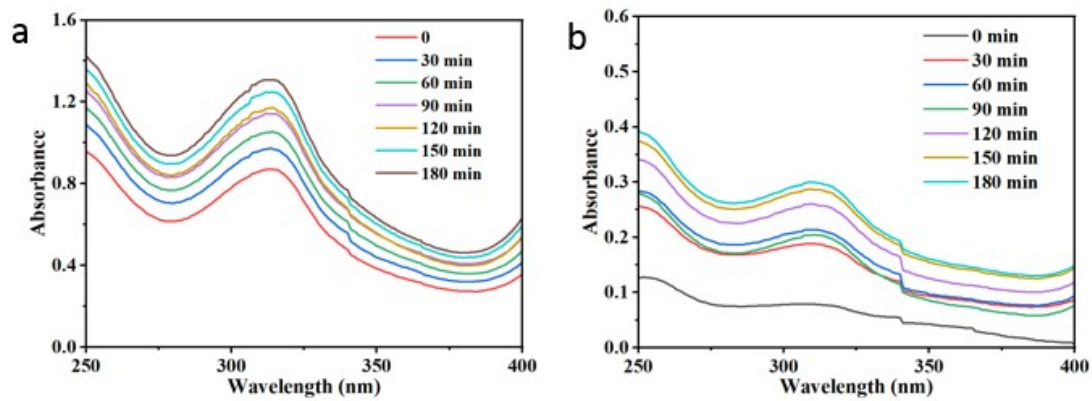

**Fig. S9** Time-dependent UV-Vis spectra of Cr(VI) under (a) pH=1 and (b) pH=5.

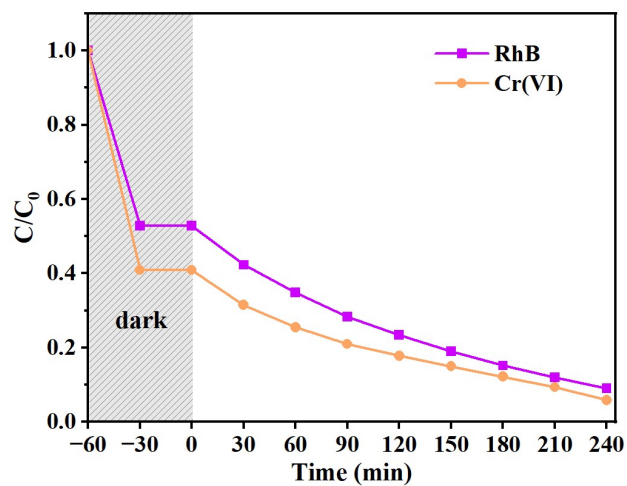

**Fig. S10** Degradation rate curve of RhB and reduction rate curve of Cr(VI) in a mixed solution over TAPP-PD-CMP.

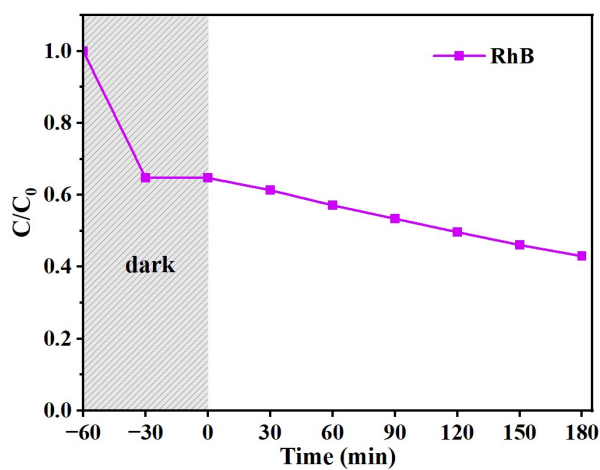

**Fig. S11** Degradation rate curves of RhB in mono-component system over TAPP-PD-CMP.

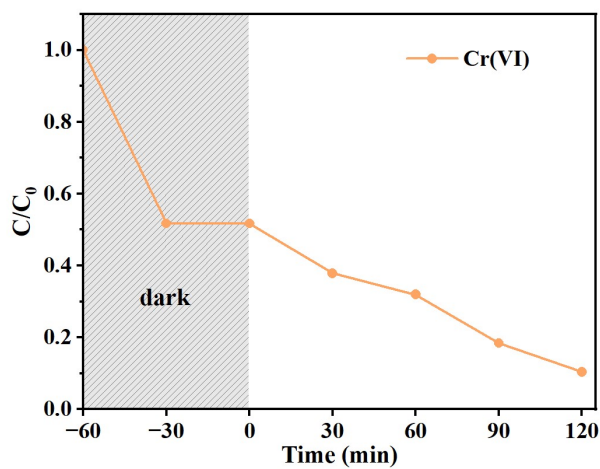

**Fig. S12** Reduction rate curves of Cr(VI) in mono-component system over TAPP-PD-CMP.

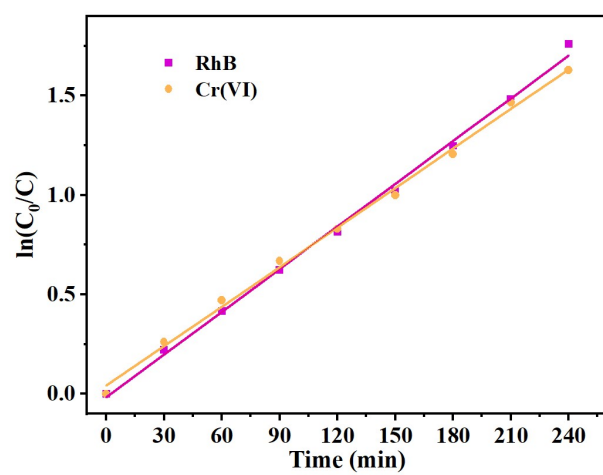

**Fig. S13** Pseudo-first order kinetics model of the mixed RhB and Cr(VI) photocatalysis process.

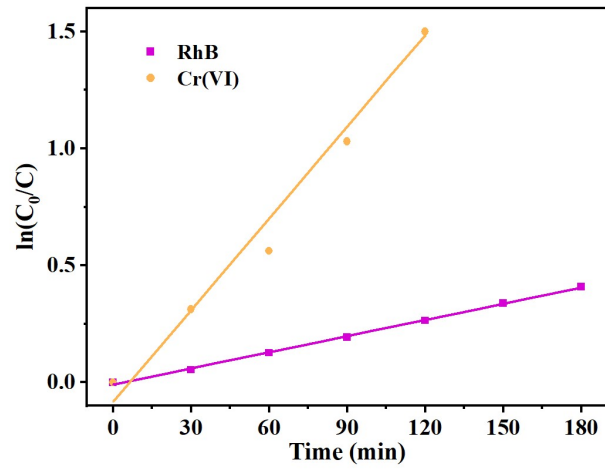

**Fig. S14** Pseudo-first order kinetics model of the alone RhB and alone Cr(VI).

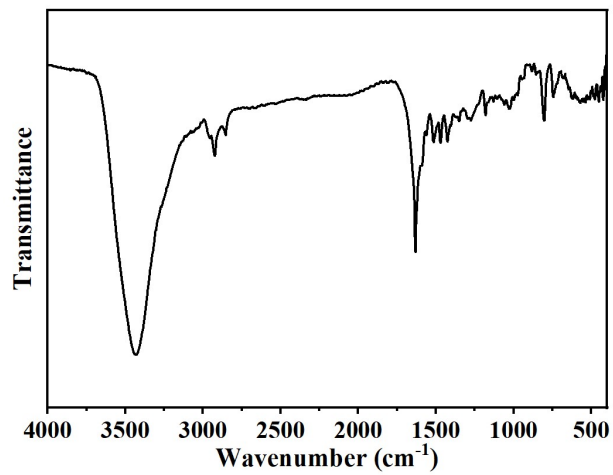

**Fig. S15** FT-IR spectrum of TAPP-PD-CMP after four photocatalytic cycles.



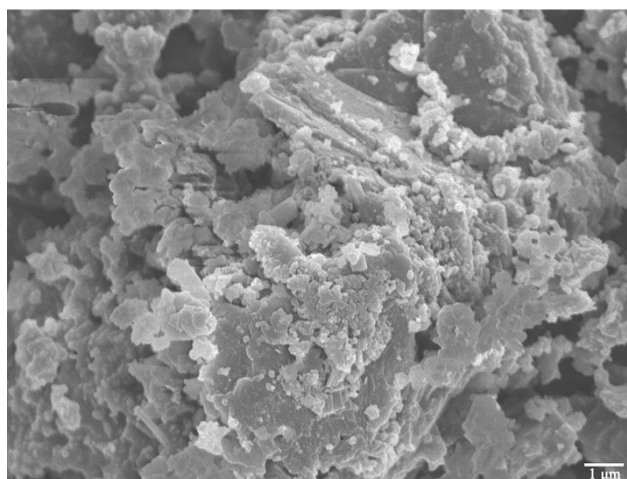

**Fig. S16** SEM image of TAPP-PD-CMP after four photocatalytic cycles.

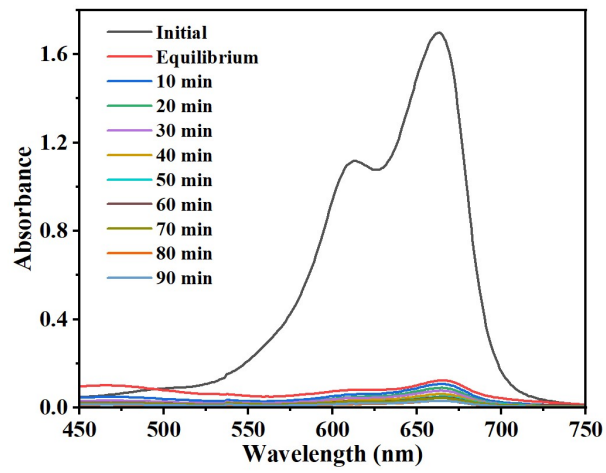

**Fig. S17** Time-dependent absorption-photocatalysis UV-Vis spectra of MB in presence of TAPP-PD-CMP photocatalyst.

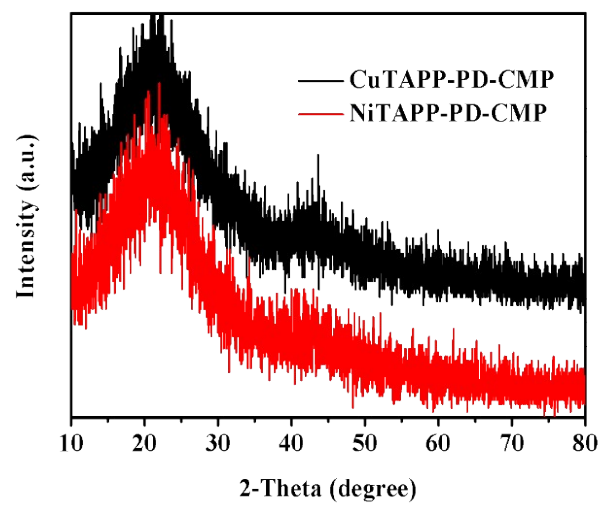

**Fig. S18** PXRD pattern of Cu-TAPP-PD-CMP and Ni-TAPP-PD-CMP.

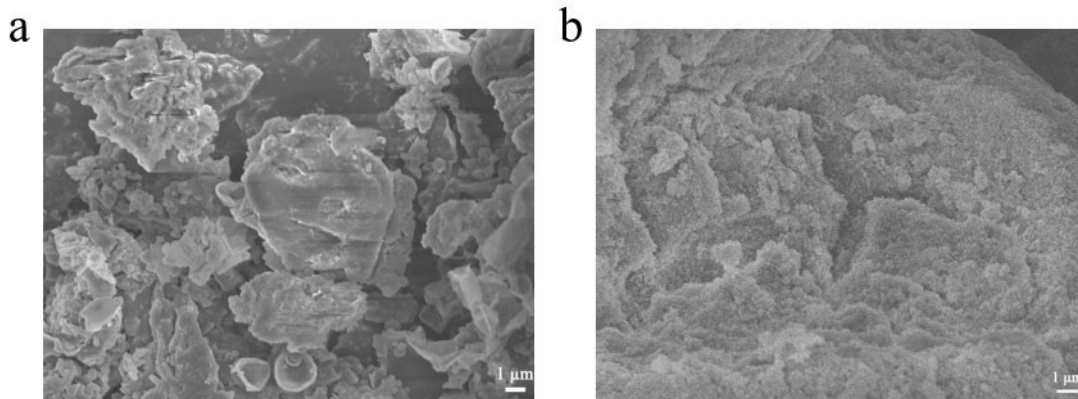

**Fig. S19** SEM image of Cu-TAPP-PD-CMP and Ni-TAPP-PD-CMP.

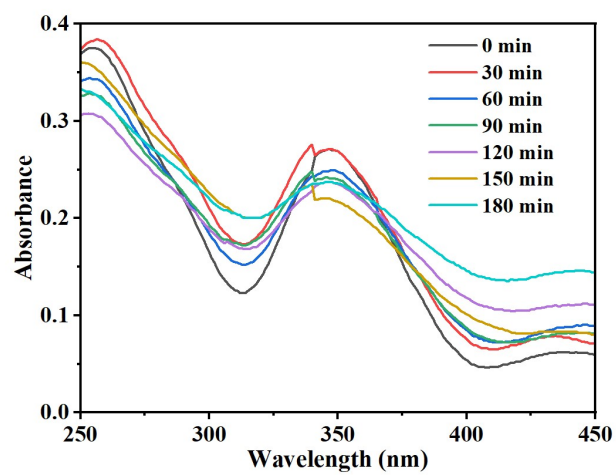

**Fig. S20** Time-dependent UV–Vis spectra of Cr(VI) over NiTAPP-PD-CMP.

**Table S1** Solubility tests of TAPP-PD-CMP and monomers

| solvent                       | TAPP | PD | TAPP-PD-CMP |
|-------------------------------|------|----|-------------|
| Water                         | –    | –  | –           |
| Ethanol                       | +    | +  | –           |
| Tetrahydrofuran               | +    | +  | –           |
| <i>N,N</i> -Dimethylformamide | +    | +  | –           |
| Dimethyl Sulfoxide            | +    | +  | –           |
| Dichloromethane               | +    | –  | –           |
| Petroleum ether               | –    | –  | –           |
| Ethyl acetate                 | –    | –  | –           |
| Toluene                       | –    | –  | –           |
